# Supplementary material
Source: PubMed Central journal article supplement (PMC2768348)
Supplement: NIHMS122118-supplement-Appendix_(Tables___Fig_etc).pdf [file NIHMS122118-supplement-Appendix_%28Tables___Fig_etc%29.pdf]

## Supplementary Appendix

This appendix has been provided by the authors to give readers additional information about their work.

Supplement to: Ikram MA, Seshadri S, Bis JC, et al. Genomewide association studies of stroke. *N Engl J Med* 2009;360:1718-28.

## List of Contents

The Supplementary Appendix has the following sections in order:

1. Abbreviations
2. Consortium organization and Sample selection
3. Stroke surveillance and classification
4. Genotyping quality control filters and imputation
5. Screening for latent population substructure
6. Meta-analysis techniques
7. Replication Samples
8. Candidate gene selection and results
9. Population attributable risk
10. Reference list

## Figures

Figure 1A and B: Quantile-quantile (QQ)-plot showing the observed versus the expected p-values after meta-analysis for total stroke and ischemic stroke respectively

Figure 2: Forest plots showing associations of rs11833579 (A, C) and rs12425791 (B, D) with total and ischemic stroke based on genotyped and imputed data from GWAS.

Figure 3: Linkage-disequilibrium plot of SNPs adjacent to the *NINJ2* gene that were significantly associated with total stroke and ischemic stroke and SNPs at the 5' end of the *NINJ2* gene

## Tables

Table 1: Results for GWAS associations with total stroke at a meta-analysis p-value lower than  $10^{-4}$

Table 2: Results for GWAS associations with ischemic stroke at a meta-analysis p-value lower than  $10^{-4}$

Table 3: Results of NINJ2 associations with total and ischemic stroke adjusted for age-, sex- and various stroke risk factors

Table 4: Characteristics of Participants in Replication Cohorts

Table 5: Association of rs12425791 and rs11833579 with various stroke related phenotypes in discovery and replication cohorts

Table 6: Associations with Putative Candidate Stroke SNPs in the CHARGE meta-analysis

## 1. Abbreviations

|          |                                                                      |
|----------|----------------------------------------------------------------------|
| AGES     | Aging Gene-Environment Study                                         |
| ARFGAP2  | ADP-ribosylation factor GTPase activating protein 2                  |
| API5     | Apoptosis Inhibitor 5                                                |
| ARIC     | Atherosclerosis Risk in Communities                                  |
| AVEN     | apoptosis caspase activation inhibitor                               |
| BBS10    | Bardet-Biedl syndrome 10                                             |
| C1QTNF7  | C1q and tumor necrosis factor related protein 7                      |
| C5orf23  | chromosome 5 open reading frame 23                                   |
| C8orf79  | chromosome 8 open reading frame 79                                   |
| C10orf88 | chromosome 10 open reading frame 88                                  |
| C11orf49 | chromosome 11 open reading frame 49                                  |
| CD36     | CD36 molecule (thrombospondin receptor)                              |
| CHARGE   | Cohorts for Heart and Aging Research in Genomic Epidemiology         |
| CHS      | Cardiovascular Health Study                                          |
| CI       | Confidence Interval                                                  |
| CKAP5    | cytoskeleton associated protein 5                                    |
| CPEB2    | cytoplasmic polyadenylation element binding protein 2                |
| DDB2     | Damage-specific DNA binding protein 2                                |
| DLC1     | deleted in liver cancer 1                                            |
| EFCAB4B  | EF-hand calcium binding domain 4B                                    |
| F2       | coagulation factor II (thrombin)                                     |
| FAM24A   | family with sequence similarity 24, member A                         |
| FHS      | Framingham Heart Study                                               |
| FIP1L1   | FIP1 like 1 ( <i>S. cerevisiae</i> )                                 |
| FUT8     | fucosyltransferase 8                                                 |
| GWAS     | Genome Wide Association Study                                        |
| GPHN     | gephyrin                                                             |
| HNT      | neurotrimin                                                          |
| HR       | Hazard Ratio                                                         |
| LD       | Linkage Disequilibrium                                               |
| LNX1     | ligand of numb-protein X 1                                           |
| LRP4     | Low density lipoprotein receptor-related protein                     |
| LRRC4C   | leucine rich repeat containing 4C                                    |
| MA       | Minor Allele                                                         |
| MAF      | Minor Allele Frequency                                               |
| MAF      | v-maf musculoaponeurotic fibrosarcoma oncogene homolog (avian)       |
| MPDZ     | multiple PDZ domain protein                                          |
| NFIB     | nuclear factor I/B                                                   |
| NINJ2    | ninjurin 2                                                           |
| NPR3     | natriuretic peptide receptor C/guanylate cyclase C (atrionatriuretic |

|         |                                                                                        |
|---------|----------------------------------------------------------------------------------------|
|         | peptide receptor C)                                                                    |
| OPCML   | opioid binding protein/cell adhesion molecule-like                                     |
| OSBPL8  | oxysterol binding protein-like 8                                                       |
| P2RY5   | purinergic receptor P2Y, G-protein coupled, 5                                          |
| PACSIN3 | Protein kinase C and casein kinase substrate in neurons 3                              |
| PAR     | Population Attributable Risk                                                           |
| PARP11  | poly (ADP-ribose) polymerase family, member 11                                         |
| QC      | Quality Control                                                                        |
| RB1     | retinoblastoma 1                                                                       |
| RYR3    | ryanodine receptor 3                                                                   |
| SD      | Standard Deviation                                                                     |
| SEMA3C  | sema domain, immunoglobulin domain (Ig), short basic domain, secreted, (semaphorin) 3C |
| SNP     | Single Nucleotide Polymorphism                                                         |
| TP63    | tumor protein p63                                                                      |
| TPRG1   | tumor protein p63 regulated 1                                                          |
| WNK1    | WNK lysine deficient protein kinase 1                                                  |

## **2. Consortium organization and Sample selection**

We combined data from white participants in four large, prospective population-based cohort studies: the Atherosclerosis Risk in Communities (ARIC) Study,<sup>1</sup> the Cardiovascular Health Study (CHS),<sup>2</sup> the Framingham Heart Study (FHS),<sup>3,4</sup> and the Rotterdam Study<sup>5</sup> to study the genetics of stroke. Together with the Aging Gene-Environment Susceptibility- Reykjavik Study (AGES-RS)<sup>6</sup> these studies form the Cohorts for Heart and Aging Research in Genomic Epidemiology (CHARGE) consortium.<sup>7</sup> However, the AGES-RS does not have data on incident stroke and hence did not contribute to this meta-analysis.

All participating studies approved guidelines for collaboration, and a neurology working-group arrived at a consensus on phenotype harmonization, covariate selection and analytic plans for within-study analyses and meta-analysis of results. Each study has an Institutional Review Board that approved the consent procedures, examination and surveillance components, data security processes, genotyping protocols and current study design.

### **ARIC:**

The ARIC study is a prospective population-based study of atherosclerosis and clinical atherosclerotic diseases in 15,792 men and women, including 11,478 non-Hispanic white participants, drawn from 4 U.S. communities (Suburban Minneapolis, Minnesota; Washington County, Maryland; Forsyth County, North Carolina, and Jackson, Mississippi). In the first three communities, the sample reflects the demographic composition of the community. In Jackson, only black residents were enrolled. Ancestry

was self-reported during an interview. Participants were handed a card and asked to tell the interviewer which best described his or her race. Choices offered were: white, black, american indian/ alaskan native, asian/pacific islander, other: specify. Over 99% identified as either white or black. Only self-identified whites were included in the discovery cohort. Participants were between age 45 and 64 years at their baseline examination in 1987-1989 when blood was drawn for DNA extraction and participants consented to genetic testing.<sup>1</sup> Genotyping was performed at the Broad Institute using the Affymetrix<sup>®</sup> Genome-Wide Human SNP Array 6.0. As of June 2008, genotyping had been completed on 8,861 white participants. Individuals with and without genotype data did not significantly differ with regards to baseline CVD risk factors (not shown). Only individuals free of stroke or TIA at baseline were included (n=8,377). We excluded individuals with a sex mismatch (n=40), those who were discordant for more than 5% of genotypes among 47 previously genotyped overlapping SNPs (n=157), persons who were 1<sup>st</sup> degree relatives (n=314), those who were outliers based on average identity by state (n=131) or based on Eigenstrat clustering (n=250), or persons who had an incident SAH (n=18); some individuals met more than one exclusion criterion. In total, 7,686 individuals were included in the present analyses.

## **CHS**

The CHS is a population-based cohort study of risk factors for coronary heart disease (CHD) and stroke in adults  $\geq 65$  years conducted across four field centers in the United States.<sup>2</sup> The original predominantly white cohort of 5,201 persons (4,964 whites) was recruited in 1989-1990 from a random sample of people on Medicare eligibility lists and

an additional 687 blacks were enrolled subsequently (1992-93) for a total sample of 5,888. As in the ARIC cohort, race was determined by self-identification at interview. In addition to the 5 categories used in the ARIC study, participants were also asked a second question as to whether they considered themselves to be of Hispanic origin. Only self-identified blacks were excluded from the discovery cohort. DNA was extracted from blood samples drawn on all participants who consented to genetic testing at their baseline examination. In 2007-2008, genotyping was performed at the General Clinical Research Center's Phenotyping/Genotyping Laboratory at Cedars-Sinai using the Illumina 370CNV Duo<sup>®</sup> BeadChip system on the first 2,427 of 3,980 CHS participants who were free of CVD at baseline. The 1,908 persons excluded for prevalent CVD had prevalent coronary heart disease (n=1195), congestive heart failure (n=86), peripheral vascular disease (n=93), valvular heart disease (n=20), stroke (n=166) or transient ischemic attack (n=56). Some persons had more than one reason to be excluded and for these individuals only the initial exclusionary event is listed. The 2,427 participants who had been genotyped by July 2008 (time of the meta-analysis) were a stratified probability sample that included all cases of myocardial infarction (MI), stroke, atrial fibrillation, dementia, and heart failure, and a selection of controls sampled based on the age-, and sex-distribution of MI cases. Sampling weights were used in the analysis to account for the study design and to weight back to the underlying cohort selected for genotyping (N=3,980). Because the other cohorts were predominantly white, the African American participants were excluded from the initial meta-analysis to limit the potential for false positive associations due to population stratification. At the time of the meta-analysis, genotyping had been attempted in 2,101 white participants, and was successful in 2,022



persons; the latter constitute the CHS sample for this study. QC criteria used to define successful genotyping are listed in Section 3, 35 persons were excluded for a subject-specific call rate  $\leq 95\%$ .

## **FHS**

The FHS is a three-generation, single-site, community-based, ongoing cohort study that was initiated in 1948 to investigate prospectively the risk factors for CVD including stroke. It now comprises 3 generations of participants (N=10,333): the Original cohort followed since 1948;<sup>3</sup> their Offspring and spouses of the Offspring, followed since 1971;<sup>4</sup> and children from the largest Offspring families enrolled in 2000 (Gen 3).<sup>8</sup> Gen 3 participants were not included in this analysis since they are young (mean age  $40 \pm 9$  years) and few have suffered strokes. The Original cohort enrolled 5209 men and women who comprised two-thirds of the adult population then residing in Framingham, MA. Survivors continue to receive biennial examinations. The Offspring cohort comprises 5124 persons (including 3514 biological offspring) who have been examined approximately once every 4 years. The population of Framingham was virtually entirely white (Europeans of English, Scots, Irish and Italian descent) in 1948 when the Original cohort was recruited. At the initial examination participants were asked for country of birth and whether or not they had any Italian ancestry. At a later examination (the 8<sup>th</sup>) the Offspring cohort participants were asked to identify their race from the following choices: Caucasian or white, African-American or black, Asian, Native Hawaiian or other Pacific Islander, American Indian or Alaska native or 'prefer not to answer'. They were also asked to identify their ethnicity as either 'Hispanic or Latino' or neither. Almost all

the FHS Original and Offspring participants are white/Caucasian and none were excluded from the discovery cohort. FHS participants had DNA extracted and provided consent for genotyping in the 1990s. All available eligible participants were genotyped at Affymetrix (Santa Clara, CA) through an NHLBI funded SNP-Health Association Resource (SHARe) project using the Affymetrix GeneChip<sup>®</sup> Human Mapping 500K Array Set and 50K Human Gene Focused Panel.<sup>®</sup> In 272 persons (31 with stroke), small amounts of DNA were extracted from stored whole blood and required whole genome amplification prior to genotyping. Cell lines were available for most of the remaining participants. Genotyping was attempted in 5293 participants, and 4,519 persons met QC criteria. Failures (call rate <97%, extreme heterozygosity or high Mendelian error rate) were largely restricted to persons with whole-genome amplified DNA and DNA extracted from stored serum samples. We also excluded 156 participants who were less than 45 years old at the time of the DNA draw, 135 persons with prevalent stroke and 97 persons who did not have stroke surveillance on follow-up after genotyping; the remaining 4,131 subjects constitute the FHS sample for this study.

### **Rotterdam Study**

The Rotterdam Study is a population-based cohort study among inhabitants of a district of Rotterdam (Ommoord), The Netherlands, and aims to examine the determinants of disease and health in the elderly with a focus on neurogeriatric, cardiovascular, bone, and eye disease.<sup>5</sup> All inhabitants aged  $\geq 55$  years ( $n = 10,275$ ) were invited and the participation rate was 78%, yielding a total of 7983 subjects. All participants gave written informed consent to retrieve information from treating physicians. Baseline

measurements were obtained from 1990 to 1993 and consisted of an interview at home and two visits to the research center for physical examination. At this baseline examination ancestry was determined by self-report. Participants were asked to identify with one of the following categories that best described their ancestry: Dutch, Caucasian, Asian, Indian, Indonesian, Mediterranean, Negroid. Less than 1% of participants chose an ancestry other than Dutch or Caucasian. All Rotterdam study participants were included in the discovery cohort. Survivors have been re-examined three times: in 1993-1995, 1997-1999, and 2002-2004. All persons attending the baseline examination in 1990-93 consented to genotyping and had DNA extracted. This DNA was genotyped using the Illumina Infinium II HumanHap550chip v3.0<sup>®</sup> array in 2007-2008 according to the manufacturer's protocols. Genotyping was attempted in persons with high-quality extracted DNA (n=6449). From these 6449, samples with low call rate (<97.5%, n=209), with excess autosomal heterozygosity (> 0.336, n=21), with sex-mismatch (n=36), or if there were outliers identified by the IBS clustering analysis (>3 standard deviations from population mean, n=102 or IBS probabilities > 97%, n=129) were excluded from the study population with some persons meeting more than one exclusion criterion; in total, 5974 samples were available with good quality genotyping data. Of these, 170 persons were excluded for prevalent stroke and 41 persons for lack of adequate follow-up after genotyping. The remaining 5763 persons constitute the Rotterdam Study sample for the present analyses.

### **3. Stroke surveillance and classification**

#### **Stroke Surveillance**

##### **ARIC:**

Persons were screened for possible stroke events through annual phone interviews, follow-up examinations, community hospital surveillance, and death certificates. Any reported hospitalization led to screening and, if suitable, to medical record abstraction. Potential stroke events were selected for abstraction of records if the discharge diagnosis included a cerebrovascular disease code (International Classification of Diseases, 9th Revision, codes 430 to 438), if a cerebrovascular procedure was mentioned in the discharge summary, or if the CT or MRI report showed evidence of acute cerebrovascular disease.<sup>9</sup> All suspected events were classified by computer algorithm and also by an expert physician reviewer, blinded to the automated results. A second physician reviewer adjudicated disagreements between the computer and the initial reviewer.

##### **CHS**

Participants were examined annually from enrollment to 1999, and since then continue to be under surveillance for stroke.<sup>10, 11</sup> Since baseline, participants have also been contacted twice a year to identify potential cardiovascular events, including stroke. In addition, all hospitalizations were screened for potential stroke events. For suspected events, information was collected from the participant or next of kin, from medical records, and, if needed, from the participant's physician. When available, CT and/or MRI scans or reports were reviewed centrally. Final adjudication of the occurrence of stroke, stroke

types, and subtypes was undertaken by vascular neurologists at a consensus conference using all available information.

## **FHS**

At each clinic exam, participants receive questionnaires, physical examinations and laboratory testing; between examinations they remain under surveillance (regardless of whether or not they live in the vicinity) via physician referrals, record linkage and annual telephone health history updates. Incident strokes have been identified since 1948 through this ongoing system of FHS clinic and local hospital surveillance and methods used have been detailed previously;<sup>12-14</sup> they include review of medical records and collaboration with local general practitioners, emergency rooms and imaging facilities. If a participant saw a physician or was admitted to the hospital, visited an emergency room or obtained any brain imaging between biennial examinations for symptoms suggestive of TIA or stroke, a stroke neurologist from the Heart Study attempted to visit the person within 48 hours and recorded a complete history and neurological examination; this was repeated at 1, 3 and 6 months. All medical records from practitioners, hospitals, imaging centers, rehabilitation centers and nursing homes were procured for review. A panel of 3 investigators (at least 2 neurologists) adjudicated the diagnosis of stroke and determined stroke subtype in each case based on the Framingham evaluations and external records. The recruitment of Original and Offspring cohort participants at FHS had occurred long before the DNA collection with the result that a large number of stroke events in the FHS (although ascertained prospectively) were prevalent at the time of DNA collection and

were excluded from these analyses. While this reduced the sample size from FHS, the meta-analyses presented here focused on incident events.

## **Rotterdam**

All participants have been continuously monitored for major events (including stroke) through automated linkage of the study database with files from general practitioners and the municipality. In addition physician files from nursing homes and general practitioner records of participants who moved out of the Ommoord district were reviewed twice a year. For suspected stroke and TIA events, additional information (including neuroimaging) was obtained from hospital records and research physicians discussed available information with an experienced stroke neurologist to verify all diagnoses.<sup>15, 16</sup>

## **Stroke Classification**

Strokes were classified as ischemic if there was imaging (CT or MRI within 4 weeks), surgical or autopsy evidence excluding a hemorrhage, or in the absence of such direct evidence (in <10% of cases in FHS and Rotterdam, none in CHS) if the preponderance of indirect evidence (e.g. deficit limited to one limb or completely resolved within 72 hours, atrial fibrillation in persons not on anticoagulants) suggested the event was an ischemic rather than a hemorrhagic stroke. A stroke was classified as hemorrhagic if there was imaging, surgical, lumbar puncture or autopsy evidence of hemorrhage, and in the absence of direct evidence to the contrary, when the participant

lost consciousness permanently or died within hours after onset of focal signs. The stroke type was defined as unknown if there was insufficient information available to categorize the event as ischemic or hemorrhagic. All ischemic and hemorrhagic strokes and strokes of unknown type were included in the analyses of total stroke with one exception: subarachnoid hemorrhages (n=28 across all studies) were excluded from these analyses since the heritability, risk factors and pathophysiologic mechanisms underlying subarachnoid hemorrhages are distinctly different from other stroke subtypes. Persons with a subarachnoid hemorrhage were censored at the time of the event.

Only known ischemic strokes were included in the analysis of ischemic stroke. In secondary analyses we related those SNPs which reached genome-wide significance in our initial GWAS to the specific ischemic stroke subtype of atherothrombotic stroke, also called atherothrombotic brain infarction (ABI). We used the best available definitions of definite and possible ABI in each cohort; both large artery atherosclerotic strokes and small-vessel or lacunar strokes were included in this phenotype, events known to be cardioembolic were excluded. In the Rotterdam study which did not subtype ischemic strokes as ABI or cardioembolic, we excluded those ischemic strokes that occurred in the presence of concomitant atrial fibrillation. For the analysis of ABI, participants were censored in the ARIC, CHS and FHS when they developed an alternative type of stroke and in the Rotterdam study if they developed atrial fibrillation.

Neuroimaging was available for 98% of all events in ARIC, 87% of all events in CHS, 90% of all events in FHS and 65% of all events in the Rotterdam study. In the current analyses we included events through December 31<sup>st</sup> 2004 for ARIC and the Rotterdam Study, and through December 31<sup>st</sup> 2005 for the CHS and FHS studies.

#### **4. Genotyping quality control filters and imputation:**

Subject specific quality control filters included filters for call rate, heterozygosity, and number of Mendelian errors per individual. SNP specific quality control filters included filters for call rate, minor allele frequency, Hardy-Weinberg equilibrium, and differential missingness by outcome or genotype (mishap test in PLINK);

<http://pngu.mgh.harvard.edu/purcell/plink/>).

#### **Imputation**

The set of genotyped input SNPs used for imputation in each study was selected based on their highest quality GWA data. We used a callrate >95% in CHS and ARIC; >97% in FHS and >98% in Rotterdam; a minor allele frequency >0.01 in each study; a Hardy-Weinberg  $p > 1 \times 10^{-5}$  in CHS and  $p > 1 \times 10^{-6}$  in ARIC, FHS, and Rotterdam; and a test of differential missingness by the “mishap” test in PLINK  $p > 1 \times 10^{-9}$  in each study. We used either the Markov Chain Haplotyping (MaCH) package

(<http://www.sph.umich.edu/csg/abecasis/MACH>) version 1.0.15 software (ARIC, FHS and Rotterdam; imputed to plus strand of NCBI build 36, HapMap release #22) or BIM-BAM<sup>17</sup> (CHS, imputed to plus strand of NCBI build 35) programs. For each imputed SNP a reliability of imputation was estimated (as the ratio of the empirically observed dosage variance to the expected binomial dosage variance: O/E ratio). For the primary meta-analysis using inverse-variance weighting less weight is given to imputed SNPs with low observed dosage variance (resulting in higher variance of the estimate). For the secondary meta- analysis using the inverse square root (N) weighting the ratio was used to compute an effective sample size.



### **Direct Genotyping**

We used the Taqman system to directly genotype SNPs that reached genome-wide significance in the initial GWAS. Rs 11833579 had been imputed in all 4 cohorts and although the estimated reliability of the imputation had been high in three of the four cohorts (O/E ratio: 0.94 to 0.97) we directly genotyped this SNP in all 4 discovery cohorts and in the ARIC African-American replication sample. Rs1245791 had been genotyped by the platforms used in the ARIC, FHS and Rotterdam studies and imputed in the CHS alone (O/E ratio of 0.47), hence it was directly genotyped in CHS. Both SNPs were also genotyped in a small sample of 574 CHS African-Americans and in the white clinical case-control series. Primers and probe sequences may be obtained from the authors on request.

## 5. Screening for latent population substructure

All four discovery cohorts were screened for latent population substructure (including cryptic relatedness) using suitable programs (i.e, EIGENSTRAT in ARIC and FHS,<sup>18, 19</sup> an IBD matrix in Rotterdam,<sup>20</sup> and using principal components analysis in CHS) and either found no evidence of occult population admixture, or found that the principal components identified were not related to the stroke phenotype.

We studied quantile-quantile (Q-Q) plots to ensure that the p-value distributions in each of the four cohorts conformed to a null distribution at all but the extreme tail. We also calculated the genomic inflation factor ( $\lambda$ ), which measures over-dispersion of test-statistics from association tests indicating population stratification and can be used to apply genomic control.<sup>21</sup> The  $\lambda$  for total stroke was 1.010 for ARIC, 1.053 for CHS, 1.029 for FHS, and 0.999 for the Rotterdam Study. For ischemic stroke it was 1.009 for ARIC, 1.064 for CHS, 1.037 for FHS, and 1.003 for the Rotterdam Study.

## 6. Meta-analysis techniques

After quality control and filtering within each study, the ARIC had either genotyped or imputed data for 2,448,797 SNPs, CHS for 2,531,169 SNPs, the FHS for 2,540,223 SNPs, and the Rotterdam study for 2,543,887 SNPs. SNPs with a minor allele frequency  $\leq 0.005$  were excluded. We restricted the present meta-analysis to the 2,194,468 autosomal SNPs common to all 4 studies. Our primary meta-analysis technique was inverse-variance weighting (also known as fixed-effects meta-analysis) after applying genomic control within each individual study. Beta estimates were weighted by their inverse variance and a combined estimate was obtained by summing the weighted betas and dividing by the summed weights. Hence results for SNPs imputed with low certainty were down-weighted because the low reliability-of-imputation (see Section 4) ensures a large variance. In contrast, studies with large sample sizes and with directly genotyped or well-imputed SNPs had a greater effect on the meta-analysis p-value because of small variances. For verification purposes we also undertook meta-analyses using inverse square root (N) weighting without genomic control and these results are included in the Supplementary tables 1 and 2. We undertook the meta-analyses at the Rotterdam study using the R-library, MetABEL (<http://mga.bionet.nsc.ru/~yurii/ABEL/>).<sup>22</sup>

We estimated the genomic inflation factor ( $\lambda$ ) after meta-analysis. The estimate of  $\lambda$  was 1.012 for total stroke and 1.006 for ischemic stroke indicating no significant inflation of p-values. The quantile-quantile (Q-Q) plot of our inverse variance meta-analysis results for total stroke (Figure 1A) and ischemic stroke (Figure 1B) show the distribution of the observed test statistic (negative log of p-values, on the y-axis) plotted

against the distribution of test statistic expected under the null-hypothesis (on the  $x$ -axis). The observed  $p$ -values conform to the null distribution across the entire range until  $p < 1.0 \times 10^{-5}$ ; we expect that true positive associations reside beyond this region and that population substructure is negligible.

## 7. Replication Samples:

Our original African-American replication sample consisted of a subset of the cohort of 4,266 African-American participants from the ARIC study. The overall design of the ARIC study is described in Section 2, and the methods used for stroke surveillance and classification are described in Section 3 of the Supplementary Appendix.<sup>1,7</sup> As of June 2008, genotyping had been completed on a sample of 2,572 African-American participants drawn randomly from the total ARIC African-American cohort. Only individuals free of stroke or TIA at baseline were included in the analyses (n=2,483). An additional 8 individuals were excluded for incident SAH. Finally, 45 individuals were excluded for failure to meet QC criteria; these individuals had a sex mismatch or were discordant for more than 5% of 47 previously genotyped SNPs. The remaining 2,430 individuals were used in the replication analyses.

Our second replication sample comprised 652 persons with prevalent stroke (313 women, mean age  $76.5 \pm 7.1$ , 501 of these persons had an ischemic type of stroke and of these 400 had an atherothrombotic stroke) and age-matched controls. The stroke cases included persons with prevalent stroke in the Rotterdam Study at baseline, and a clinical series of ischemic strokes obtained from three hospitals. The first was the Erasmus MC University Medical Center, Rotterdam (n=271, 246 atherothrombotic), the second was the St Elisabeth Hospital, Tilburg (n=99, of which 76 were atherothrombotic), and the third was the TweeSteden Hospital, Tilburg (n=131, of which 31 were atherothrombotic). These clinical databases aim to collect clinical information, blood samples and DNA in all ischemic stroke patients evaluated at these hospitals. Controls were drawn from the group of Rotterdam Study participants who were stroke-free at baseline and were within

the same age range as the cases. These persons contributed one set of person-years to the prevalent analysis and a second, non-overlapping set of person-years to the incident analyses. Therefore the two analyses are independent of each other, this was confirmed with simulation experiments. A third, small and underpowered sample that was genotyped consisted of 574 African-Americans in the CHS who were free of prevalent cardiovascular disease at baseline and had been followed prospectively for incident stroke. Over a 10 year follow-up period a total of 85 incident strokes (68 ischemic, 57 atherothrombotic) were observed. Baseline characteristics of the replication cohorts are shown in Supplementary Table 4.

## 8. Candidate genes: selection and results

### SNP selection

We searched Pubmed for original articles published before July 1<sup>st</sup> 2008, which reported statistically significant associations between specific genotypes and stroke. Since over 200 putative candidate genes for stroke have been described in the literature, we focused on genes identified as potential candidates for total stroke and ischemic stroke in whites by meta-analyses of the published literature. We used the search terms *meta-analysis*, *stroke* and *gene* and identified a total of 41 publications; we retrieved and reviewed all of them. We identified 12 meta-analyses,<sup>23-34</sup> each of which studied white participants, and reported a significant association of at least one SNP within a gene with the risk of either total stroke or ischemic stroke in the pooled analyses. A total of 9 candidate genes were identified by this process. We selected SNPs that had been specifically examined in these meta-analyses, ignoring data based on linkage studies. Based on these criteria we studied selected SNPs in the following genes: 5,10-methylene tetrahydrofolate reductase (*MTHFR*),<sup>24</sup> Factor 5 Leiden (*F5*),<sup>24</sup> phosphodiesterase D (*PDE4D*)<sup>31, 33, 34</sup>, plasminogen activator inhibitor type 1 or serpin peptidase inhibitor (*SERPINE1*),<sup>23, 29</sup> prothrombin (*F2*),<sup>24</sup> glycoprotein 1b alpha (*GP1BA*),<sup>27</sup> arachidonate 5-lipoxygenase-activating protein (*ALOX5AP*), apolipoprotein E (*APOE*).<sup>28, 32, 34</sup> We also selected a proxy SNP for the ACE insertion/deletion that has been associated with the risk of ischemic stroke.<sup>35</sup> Finally, we selected two intergenic SNPs at chromosome 4q25 and 9p21 that have been related previously to atrial fibrillation and coronary artery disease, respectively, and more recently to cardioembolic (rs2200733)<sup>36</sup> and thrombotic (rs1537378) strokes.

**Results** are presented in Supplementary Table 6 below. Rs16954257 in the *GPIBA* gene, a proxy SNP for rs2243093 previously associated with stroke,<sup>27</sup> was significantly associated with total stroke (p=0.02) and ischemic stroke (p=0.02) in our meta-analysis. For the prothrombin (*F2*) gene neither the reported SNP nor a proxy SNP with LD>0.8 was genotyped or imputed in our dataset.<sup>24</sup> However, six other SNPs within that gene (rs3136447, rs2070852, rs5896, rs3136457, rs3136480 and rs2282687) reached p<10<sup>-4</sup> for total stroke (see Supplementary Table 1 rows 206 to 211).



## 9. Population attributable risk

Population attributable risk is an index incorporating both frequency of a risk factor and the risk ratio of outcome with and without the risk factor. It represents the proportion of a specific disease in the population attributable to this risk factor. Estimation of PAR is usually more accurate in cohort studies than in case/control studies where the odds-ratio may overestimate risk. The PAR for individual SNPs such as rs11833579 and rs12425791 was calculated as follows:

$$PAR = 1 - \frac{1}{q^2 + 2pq(HR) + p^2(HR^2)}$$

where q = major allele frequency; p = minor allele frequency and HR =the hazard ratio from the meta-analysis based on an additive model for increasing dose of the risk allele.<sup>37</sup>

## 11. Reference List

1. The Atherosclerosis Risk in Communities (ARIC) Study: design and objectives. The ARIC investigators. *Am J Epidemiol* 1989;129:687-702.
2. Fried LP, Borhani NO, Enright P et al. The Cardiovascular Health Study: design and rationale. *Ann Epidemiol* 1991;1:263-276.
3. Dawber TR, Kannel WB. The Framingham study. An epidemiological approach to coronary heart disease. *Circulation* 1966;34:553-555.
4. Feinleib M, Kannel WB, Garrison RJ, McNamara PM, Castelli WP. The Framingham Offspring Study. Design and preliminary data. *Prev Med* 1975;4:518-525.
5. Hofman A, Breteler MM, van Duijn CM et al. The Rotterdam Study: objectives and design update. *Eur J Epidemiol* 2007;22:819-829.
6. Harris TB, Launer LJ, Eiriksdottir G et al. Age, Gene/Environment Susceptibility-Reykjavik Study: multidisciplinary applied phenomics. *Am J Epidemiol* 2007;165:1076-1087.
7. Psaty BM, O'Donnell CJ, Gudnason V et al. Cohorts for Heart and Aging Research in Genomic Epidemiology (CHARGE) Consortium: Design of prospective meta-analyses of genome-wide association studies from five cohorts. *Circ Cardiovasc Genet* 2009; 2:73-80.
8. Splansky GL, Corey D, Yang Q et al. The Third Generation Cohort of the National Heart, Lung, and Blood Institute's Framingham Heart Study: design, recruitment, and initial examination. *Am J Epidemiol* 2007;165:1328-1335.
9. Rosamond WD, Folsom AR, Chambless LE et al. Stroke incidence and survival among middle-aged adults: 9-year follow-up of the Atherosclerosis Risk in Communities (ARIC) cohort. *Stroke* 1999;30:736-743.
10. Longstreth WT, Jr., Bernick C, Fitzpatrick A et al. Frequency and predictors of stroke death in 5,888 participants in the Cardiovascular Health Study. *Neurology* 2001;56:368-375.
11. Price TR, Psaty B, O'Leary D, Burke G, Gardin J. Assessment of cerebrovascular disease in the Cardiovascular Health Study. *Ann Epidemiol* 1993;3:504-507.
12. Carandang R, Seshadri S, Beiser A et al. Trends in incidence, lifetime risk, severity, and 30-day mortality of stroke over the past 50 years. *JAMA* 2006;296:2939-2946.
13. Seshadri S, Beiser A, Kelly-Hayes M et al. The lifetime risk of stroke: estimates from the Framingham Study. *Stroke* 2006;37:345-350.

14. **Wolf PA, Kannel WB, Dawber TR. Prospective investigations: the Framingham study and the epidemiology of stroke. *Adv Neurol* 1978;19:107-120.**
15. **Bots ML, Looman SJ, Koudstaal PJ, Hofman A, Hoes AW, Grobbee DE. Prevalence of stroke in the general population. The Rotterdam Study. *Stroke* 1996;27:1499-1501.**
16. **Hollander M, Koudstaal PJ, Bots ML, Grobbee DE, Hofman A, Breteler MM. Incidence, risk, and case fatality of first ever stroke in the elderly population. The Rotterdam Study. *J Neurol Neurosurg Psychiatry* 2003;74:317-321.**
17. **Servin B, Stephens M. Imputation-based analysis of association studies: candidate regions and quantitative traits. *PLoS Genet* 2007;3:e114.**
18. **Patterson N, Price AL, Reich D. Population structure and eigenanalysis. *PLoS Genet* 2006;2:e190.**
19. **Price AL, Patterson NJ, Plenge RM, Weinblatt ME, Shadick NA, Reich D. Principal components analysis corrects for stratification in genome-wide association studies. *Nat Genet* 2006;38:904-909.**
20. **Richards JB, Rivadeneira F, Inouye M et al. Bone mineral density, osteoporosis, and osteoporotic fractures: a genome-wide association study. *Lancet* 2008;371:1505-1512.**
21. **Bacanu SA, Devlin B, Roeder K. The power of genomic control. *Am J Hum Genet* 2000;66:1933-1944.**
22. **Aulchenko YS, Ripke S, Isaacs A, van Duijn CM. GenABEL: an R library for genome-wide association analysis. *Bioinformatics* 2007;23:1294-1296.**
23. **Attia J, Thakkestian A, Wang Y et al. The PAI-1 4G/5G gene polymorphism and ischemic stroke: an association study and meta-analysis. *J Stroke Cerebrovasc Dis* 2007;16:173-179.**
24. **Casas JP, Hingorani AD, Bautista LE, Sharma P. Meta-analysis of genetic studies in ischemic stroke: thirty-two genes involving approximately 18,000 cases and 58,000 controls. *Arch Neurol* 2004;61:1652-1661.**
25. **Cronin S, Furie KL, Kelly PJ. Dose-related association of MTHFR 677T allele with risk of ischemic stroke: evidence from a cumulative meta-analysis. *Stroke* 2005;36:1581-1587.**
26. **Kelly PJ, Rosand J, Kistler JP et al. Homocysteine, MTHFR 677C-->T polymorphism, and risk of ischemic stroke: results of a meta-analysis. *Neurology* 2002;59:529-536.**

27. Maguire JM, Thakkinstian A, Sturm J et al. Polymorphisms in platelet glycoprotein 1b $\alpha$  and factor VII and risk of ischemic stroke: a meta-analysis. *Stroke* 2008;39:1710-1716.
28. McCarron MO, Delong D, Alberts MJ. APOE genotype as a risk factor for ischemic cerebrovascular disease: a meta-analysis. *Neurology* 1999;53:1308-1311.
29. Tsantes AE, Nikolopoulos GK, Bagos PG et al. Plasminogen activator inhibitor-1 4G/5G polymorphism and risk of ischemic stroke: a meta-analysis. *Blood Coagul Fibrinolysis* 2007;18:497-504.
30. Wu AH, Tsongalis GJ. Correlation of polymorphisms to coagulation and biochemical risk factors for cardiovascular diseases. *Am J Cardiol* 2001;87:1361-1366.
31. Staton JM, Sayer MS, Hankey GJ et al. Association between phosphodiesterase 4D gene and ischaemic stroke. *J Neurol Neurosurg Psychiatry* 2006;77:1067-1069.
32. Baum L, Ng HK, Wong KS et al. Associations of apolipoprotein E exon 4 and lipoprotein lipase S447X polymorphisms with acute ischemic stroke and myocardial infarction. *Clin Chem Lab Med* 2006;44:274-281.
33. Bevan S, Dichgans M, Gschwendtner A, Kuhlenbaumer G, Ringelstein EB, Markus HS. Variation in the PDE4D gene and ischemic stroke risk: a systematic review and meta-analysis on 5200 cases and 6600 controls. *Stroke* 2008;39:1966-1971.
34. Lovkvist H, Smith JG, Luthman H et al. Ischaemic stroke in hypertensive patients is associated with variations in the PDE4D genome region. *Eur J Hum Genet* 2008;16:1117-1125.
35. Abdollahi MR, Huang S, Rodriguez S et al. Homogeneous assay of rs4343, an ACE I/D proxy, and an analysis in the British Women's Heart and Health Study (BWHHS). *Dis Markers* 2008;24:11-17.
36. Gretarsdottir S, Thorleifsson G, Manolescu A et al. Risk variants for atrial fibrillation on chromosome 4q25 associate with ischemic stroke. *Ann Neurol* 2008;64:402-409.
37. Rockhill B, Newman B, Weinberg C. Use and misuse of population attributable fractions. *Am J Public Health* 1998;88:15-19.

**Figures 1A and 1B. Quantile-quantile (QQ)-plot showing the observed versus the expected p-values after meta-analysis for total stroke and ischemic stroke respectively. The red line shows the distribution under the null-hypothesis (also uploaded as separate figures).**

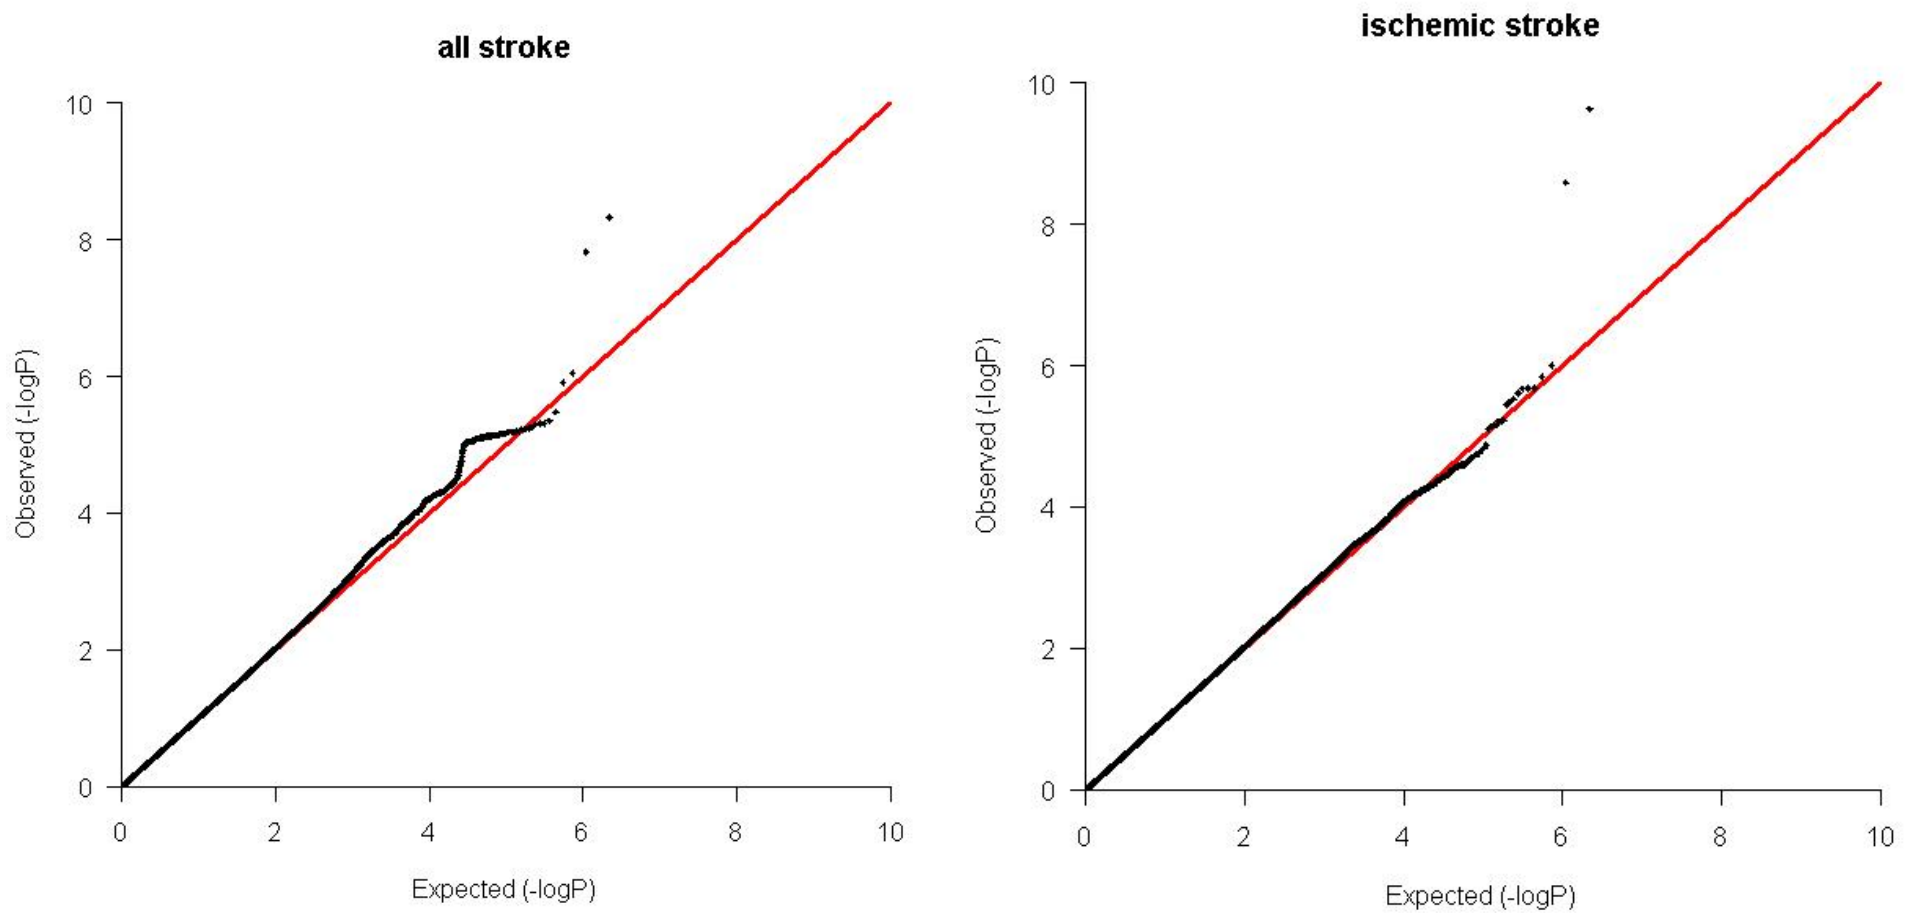

### A. all stroke (rs11833579)

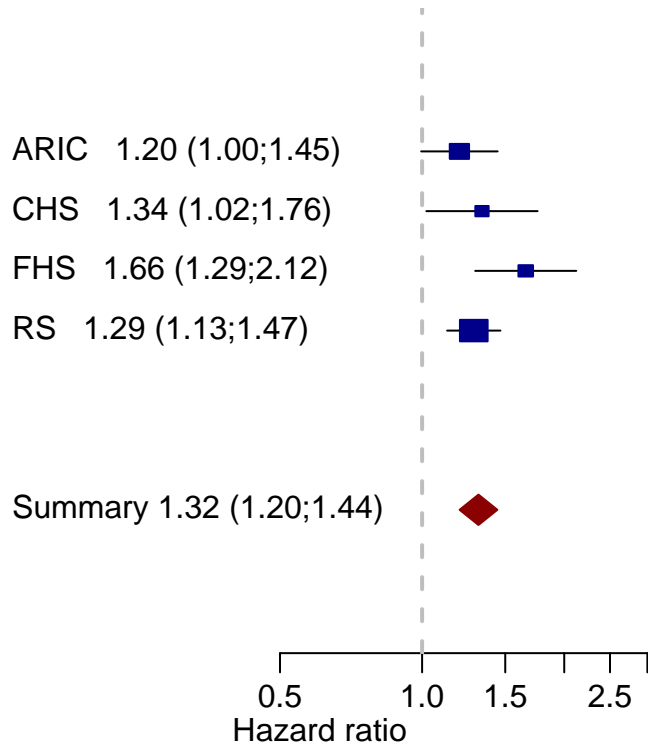

### B. all stroke (rs12425791)

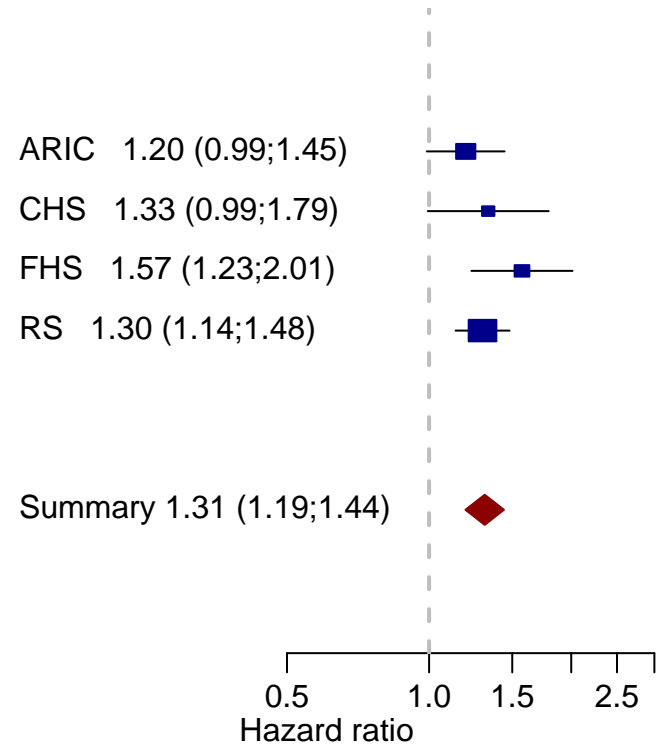

### C. ischemic stroke (rs11833579)

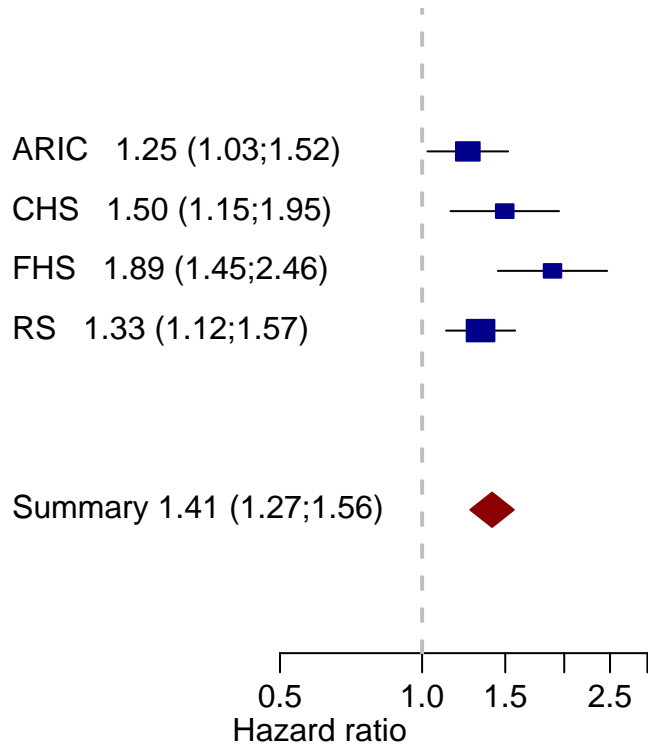

### D. ischemic stroke (rs12425791)

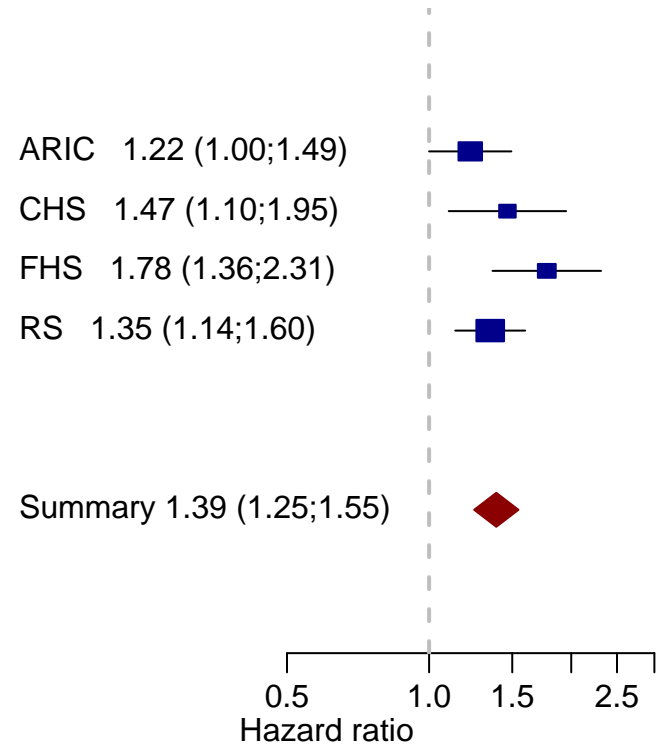

**Supplementary Appendix: Figure 2: Forest plots based on initial GWAS for total stroke: rs11833579 (A) and rs12425791 (B) and for ischemic stroke: rs11833579 (C) and rs12425791 (D).**

Figure 3: Linkage-disequilibrium plot of SNPs adjacent to the *NINJ2* gene that were significantly associated with total stroke and ischemic stroke and SNPs at the 5' end of the *NINJ2* gene (also uploaded as separate figure). SNPs in bold are those that were significantly associated with total stroke and ischemic stroke

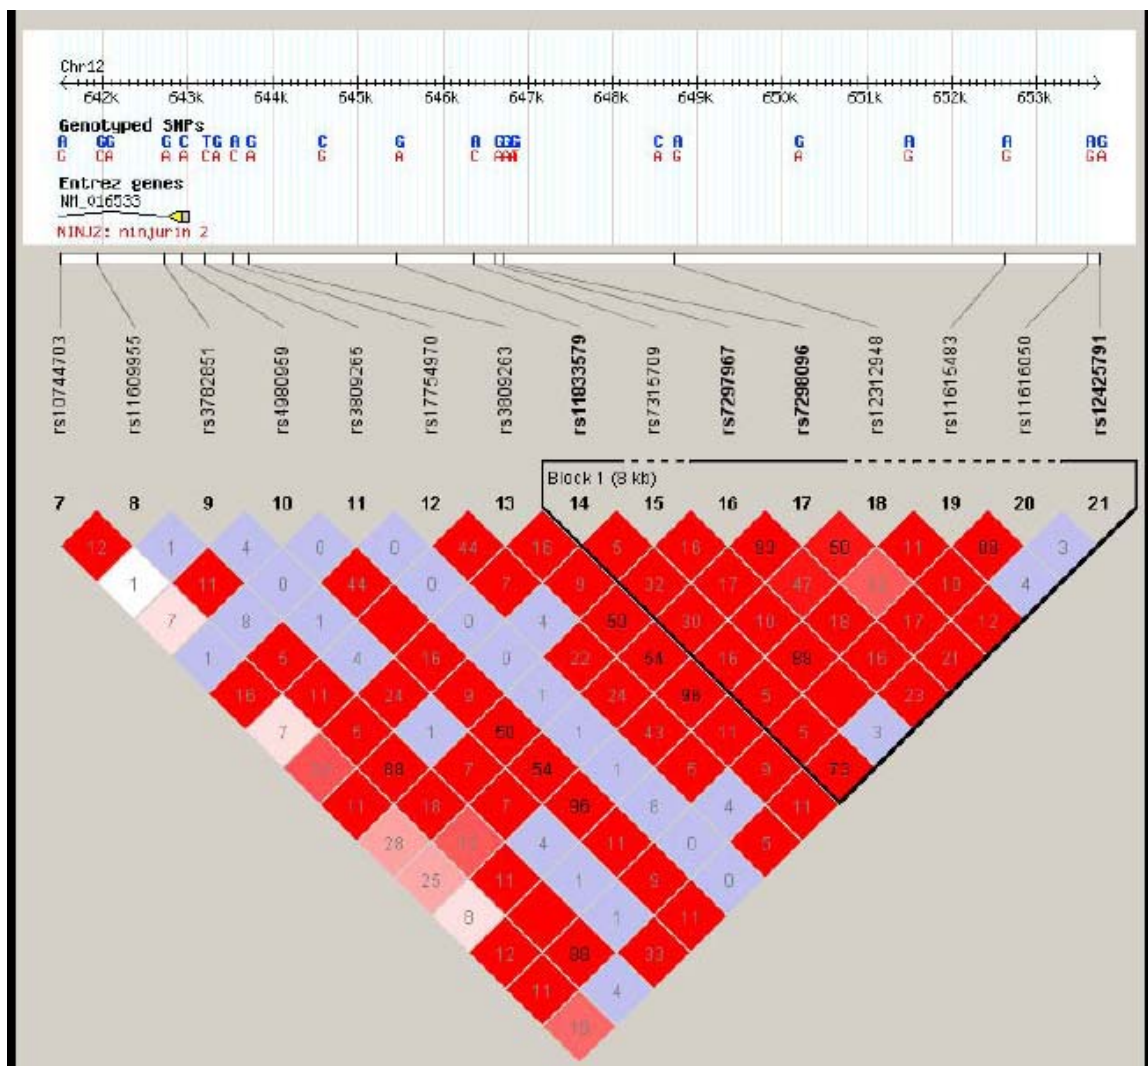

**Tables 1 (total stroke) and 2 (ischemic stroke): results for all associations with a meta-analysis p-value lower than  $10^{-4}$**

Results are ordered by chromosomal number and position. The table provides details specific to the individual participating cohorts including whether SNP was genotyped with sufficient reliability to be used in imputation [1] or was imputed [0], and the hazard ratios (with 95% confidence intervals) and p-values within each participating cohort. It also provides hazard ratios (95% confidence intervals) and p-values based on fixed-effects (inverse variance-weighted) meta-analysis and Z-test statistics and p-values based on inverse square root (N) weighting meta-analysis. The Human Gene Organization (HUGO) Gene Nomenclature System symbols for the two genes located closest to each SNP and the distance of the associated SNP from the 5' end (start) of the gene are also shown. Standardized gene annotations for all SNP results were derived programatically from the UCSC Genome Browser RefSeq gene track (hg18). Distances to genes are given in kilo-base (kb) pairs, based on NCBI build #36.











| name | chromosome | position | strand | allele1 | allele2 | new<br>allele | ref<br>allele | r2 | r3 | r4 | r5 | r6 | r7 | r8 | r9 | r10 | r11 | r12 | r13 | r14 | r15 | r16 | r17 | r18 | r19 | r20 | r21 | r22 | r23 | r24 | r25 | r26 | r27 | r28 | r29 | r30 | r31 | r32 | r33 | r34 | r35 | r36 | r37 | r38 | r39 | r40 | r41 | r42 | r43 | r44 | r45 | r46 | r47 | r48 | r49 | r50 | r51 | r52 | r53 | r54 | r55 | r56 | r57 | r58 | r59 | r60 | r61 | r62 | r63 | r64 | r65 | r66 | r67 | r68 | r69 | r70 | r71 | r72 | r73 | r74 | r75 | r76 | r77 | r78 | r79 | r80 | r81 | r82 | r83 | r84 | r85 | r86 | r87 | r88 | r89 | r90 | r91 | r92 | r93 | r94 | r95 | r96 | r97 | r98 | r99 | r100 | r101 | r102 | r103 | r104 | r105 | r106 | r107 | r108 | r109 | r110 | r111 | r112 | r113 | r114 | r115 | r116 | r117 | r118 | r119 | r120 | r121 | r122 | r123 | r124 | r125 | r126 | r127 | r128 | r129 | r130 | r131 | r132 | r133 | r134 | r135 | r136 | r137 | r138 | r139 | r140 | r141 | r142 | r143 | r144 | r145 | r146 | r147 | r148 | r149 | r150 | r151 | r152 | r153 | r154 | r155 | r156 | r157 | r158 | r159 | r160 | r161 | r162 | r163 | r164 | r165 | r166 | r167 | r168 | r169 | r170 | r171 | r172 | r173 | r174 | r175 | r176 | r177 | r178 | r179 | r180 | r181 | r182 | r183 | r184 | r185 | r186 | r187 | r188 | r189 | r190 | r191 | r192 | r193 | r194 | r195 | r196 | r197 | r198 | r199 | r200 | r201 | r202 | r203 | r204 | r205 | r206 | r207 | r208 | r209 | r210 | r211 | r212 | r213 | r214 | r215 | r216 | r217 | r218 | r219 | r220 | r221 | r222 | r223 | r224 | r225 | r226 | r227 | r228 | r229 | r230 | r231 | r232 | r233 | r234 | r235 | r236 | r237 | r238 | r239 | r240 | r241 | r242 | r243 | r244 | r245 | r246 | r247 | r248 | r249 | r250 | r251 | r252 | r253 | r254 | r255 | r256 | r257 | r258 | r259 | r260 | r261 | r262 | r263 | r264 | r265 | r266 | r267 | r268 | r269 | r270 | r271 | r272 | r273 | r274 | r275 | r276 | r277 | r278 | r279 | r280 | r281 | r282 | r283 | r284 | r285 | r286 | r287 | r288 | r289 | r290 | r291 | r292 | r293 | r294 | r295 | r296 | r297 | r298 | r299 | r300 | r301 | r302 | r303 | r304 | r305 | r306 | r307 | r308 | r309 | r310 | r311 | r312 | r313 | r314 | r315 | r316 | r317 | r318 | r319 | r320 | r321 | r322 | r323 | r324 | r325 | r326 | r327 | r328 | r329 | r330 | r331 | r332 | r333 | r334 | r335 | r336 | r337 | r338 | r339 | r340 | r341 | r342 | r343 | r344 | r345 | r346 | r347 | r348 | r349 | r350 | r351 | r352 | r353 | r354 | r355 | r356 | r357 | r358 | r359 | r360 | r361 | r362 | r363 | r364 | r365 | r366 | r367 | r368 | r369 | r370 | r371 | r372 | r373 | r374 | r375 | r376 | r377 | r378 | r379 | r380 | r381 | r382 | r383 | r384 | r385 | r386 | r387 | r388 | r389 | r390 | r391 | r392 | r393 | r394 | r395 | r396 | r397 | r398 | r399 | r400 | r401 | r402 | r403 | r404 | r405 | r406 | r407 | r408 | r409 | r410 | r411 | r412 | r413 | r414 | r415 | r416 | r417 | r418 | r419 | r420 | r421 | r422 | r423 | r424 | r425 | r426 | r427 | r428 | r429 | r430 | r431 | r432 | r433 | r434 | r435 | r436 | r437 | r438 | r439 | r440 | r441 | r442 | r443 | r444 | r445 | r446 | r447 | r448 | r449 | r450 | r451 | r452 | r453 | r454 | r455 | r456 | r457 | r458 | r459 | r460 | r461 | r462 | r463 | r464 | r465 | r466 | r467 | r468 | r469 | r470 | r471 | r472 | r473 | r474 | r475 | r476 | r477 | r478 | r479 | r480 | r481 | r482 | r483 | r484 | r485 | r486 | r487 | r488 | r489 | r490 | r491 | r492 | r493 | r494 | r495 | r496 | r497 | r498 | r499 | r500 | r501 | r502 | r503 | r504 | r505 | r506 | r507 | r508 | r509 | r510 | r511 | r512 | r513 | r514 | r515 | r516 | r517 | r518 | r519 | r520 | r521 | r522 | r523 | r524 | r525 | r526 | r527 | r528 | r529 | r530 | r531 | r532 | r533 | r534 | r535 | r536 | r537 | r538 | r539 | r540 | r541 | r542 | r543 | r544 | r545 | r546 | r547 | r548 | r549 | r550 | r551 | r552 | r553 | r554 | r555 | r556 | r557 | r558 | r559 | r560 | r561 | r562 | r563 | r564 | r565 | r566 | r567 | r568 | r569 | r570 | r571 | r572 | r573 | r574 | r575 | r576 | r577 | r578 | r579 | r580 | r581 | r582 | r583 | r584 | r585 | r586 | r587 | r588 | r589 | r590 | r591 | r592 | r593 | r594 | r595 | r596 | r597 | r598 | r599 | r600 | r601 | r602 | r603 | r604 | r605 | r606 | r607 | r608 | r609 | r610 | r611 | r612 | r613 | r614 | r615 | r616 | r617 | r618 | r619 | r620 | r621 | r622 | r623 | r624 | r625 | r626 | r627 | r628 | r629 | r630 | r631 | r632 | r633 | r634 | r635 | r636 | r637 | r638 | r639 | r640 | r641 | r642 | r643 | r644 | r645 | r646 | r647 | r648 | r649 | r650 | r651 | r652 | r653 | r654 | r655 | r656 | r657 | r658 | r659 | r660 | r661 | r662 | r663 | r664 | r665 | r666 | r667 | r668 | r669 | r670 | r671 | r672 | r673 | r674 | r675 | r676 | r677 | r678 | r679 | r680 | r681 | r682 | r683 | r684 | r685 | r686 | r687 | r688 | r689 | r690 | r691 | r692 | r693 | r694 | r695 | r696 | r697 | r698 | r699 | r700 | r701 | r702 | r703 | r704 | r705 | r706 | r707 | r708 | r709 | r710 | r711 | r712 | r713 | r714 | r715 | r716 | r717 | r718 | r719 | r720 | r721 | r722 | r723 | r724 | r725 | r726 | r727 | r728 | r729 | r730 | r731 | r732 | r733 | r734 | r735 | r736 | r737 | r738 | r739 | r740 | r741 | r742 | r743 | r744 | r745 | r746 | r747 | r748 | r749 | r750 | r751 | r752 | r753 | r754 | r755 | r756 | r757 | r758 | r759 | r760 | r761 | r762 | r763 | r764 | r765 | r766 | r767 | r768 | r769 | r770 | r771 | r772 | r773 | r774 | r775 | r776 | r777 | r778 | r779 | r780 | r781 | r782 | r783 | r784 | r785 | r786 | r787 | r788 | r789 | r790 | r791 | r792 | r793 | r794 | r795 | r796 | r797 | r798 | r799 | r800 | r801 | r802 | r803 | r804 | r805 | r806 | r807 | r808 | r809 | r810 | r811 | r812 | r813 | r814 | r815 | r816 | r817 | r818 | r819 | r820 | r821 | r822 | r823 | r824 | r825 | r826 | r827 | r828 | r829 | r830 | r831 | r832 | r833 | r834 | r835 | r836 | r837 | r838 | r839 | r840 | r841 | r842 | r843 | r844 | r845 | r846 | r847 | r848 | r849 | r850 | r851 | r852 | r853 | r854 | r855 | r856 | r857 | r858 | r859 | r860 | r861 | r862 | r863 | r864 | r865 | r866 | r867 | r868 | r869 | r870 | r871 | r872 | r873 | r874 | r875 | r876 | r877 | r878 | r879 | r880 | r881 | r882 | r883 | r884 | r885 | r886 | r887 | r888 | r889 | r890 | r891 | r892 | r893 | r894 | r895 | r896 | r897 | r898 | r899 | r900 | r901 | r902 | r903 | r904 | r905 | r906 | r907 | r908 | r909 | r910 | r911 | r912 | r913 | r914 | r915 | r916 | r917 | r918 | r919 | r920 | r921 | r922 | r923 | r924 | r925 | r926 | r927 | r928 | r929 | r930 | r931 | r932 | r933 | r934 | r935 | r936 | r937 | r938 | r939 | r940 | r941 | r942 | r943 | r944 | r945 | r946 | r947 | r948 | r949 | r950 | r951 | r952 | r953 | r954 | r955 | r956 | r957 | r958 | r959 | r960 | r961 | r962 | r963 | r964 | r965 | r966 | r967 | r968 | r969 | r970 | r971 | r972 | r973 | r974 | r975 | r976 | r977 | r978 | r979 | r980 | r981 | r982 | r983 | r984 | r985 | r986 | r987 | r988 | r989 | r990 | r991 | r992 | r993 | r994 | r995 | r996 | r997 | r998 | r999 | r1000 | r1001 | r1002 | r1003 | r1004 | r1005 | r1006 | r1007 | r1008 | r1009 | r1010 | r1011 | r1012 | r1013 | r1014 | r1015 | r1016 | r1017 | r1018 | r1019 | r1020 | r1021 | r1022 | r1023 | r1024 | r1025 | r1026 | r1027 | r1028 | r1029 | r10 |
|------|------------|----------|--------|---------|---------|---------------|---------------|----|----|----|----|----|----|----|----|-----|-----|-----|-----|-----|-----|-----|-----|-----|-----|-----|-----|-----|-----|-----|-----|-----|-----|-----|-----|-----|-----|-----|-----|-----|-----|-----|-----|-----|-----|-----|-----|-----|-----|-----|-----|-----|-----|-----|-----|-----|-----|-----|-----|-----|-----|-----|-----|-----|-----|-----|-----|-----|-----|-----|-----|-----|-----|-----|-----|-----|-----|-----|-----|-----|-----|-----|-----|-----|-----|-----|-----|-----|-----|-----|-----|-----|-----|-----|-----|-----|-----|-----|-----|-----|-----|-----|-----|-----|-----|------|------|------|------|------|------|------|------|------|------|------|------|------|------|------|------|------|------|------|------|------|------|------|------|------|------|------|------|------|------|------|------|------|------|------|------|------|------|------|------|------|------|------|------|------|------|------|------|------|------|------|------|------|------|------|------|------|------|------|------|------|------|------|------|------|------|------|------|------|------|------|------|------|------|------|------|------|------|------|------|------|------|------|------|------|------|------|------|------|------|------|------|------|------|------|------|------|------|------|------|------|------|------|------|------|------|------|------|------|------|------|------|------|------|------|------|------|------|------|------|------|------|------|------|------|------|------|------|------|------|------|------|------|------|------|------|------|------|------|------|------|------|------|------|------|------|------|------|------|------|------|------|------|------|------|------|------|------|------|------|------|------|------|------|------|------|------|------|------|------|------|------|------|------|------|------|------|------|------|------|------|------|------|------|------|------|------|------|------|------|------|------|------|------|------|------|------|------|------|------|------|------|------|------|------|------|------|------|------|------|------|------|------|------|------|------|------|------|------|------|------|------|------|------|------|------|------|------|------|------|------|------|------|------|------|------|------|------|------|------|------|------|------|------|------|------|------|------|------|------|------|------|------|------|------|------|------|------|------|------|------|------|------|------|------|------|------|------|------|------|------|------|------|------|------|------|------|------|------|------|------|------|------|------|------|------|------|------|------|------|------|------|------|------|------|------|------|------|------|------|------|------|------|------|------|------|------|------|------|------|------|------|------|------|------|------|------|------|------|------|------|------|------|------|------|------|------|------|------|------|------|------|------|------|------|------|------|------|------|------|------|------|------|------|------|------|------|------|------|------|------|------|------|------|------|------|------|------|------|------|------|------|------|------|------|------|------|------|------|------|------|------|------|------|------|------|------|------|------|------|------|------|------|------|------|------|------|------|------|------|------|------|------|------|------|------|------|------|------|------|------|------|------|------|------|------|------|------|------|------|------|------|------|------|------|------|------|------|------|------|------|------|------|------|------|------|------|------|------|------|------|------|------|------|------|------|------|------|------|------|------|------|------|------|------|------|------|------|------|------|------|------|------|------|------|------|------|------|------|------|------|------|------|------|------|------|------|------|------|------|------|------|------|------|------|------|------|------|------|------|------|------|------|------|------|------|------|------|------|------|------|------|------|------|------|------|------|------|------|------|------|------|------|------|------|------|------|------|------|------|------|------|------|------|------|------|------|------|------|------|------|------|------|------|------|------|------|------|------|------|------|------|------|------|------|------|------|------|------|------|------|------|------|------|------|------|------|------|------|------|------|------|------|------|------|------|------|------|------|------|------|------|------|------|------|------|------|------|------|------|------|------|------|------|------|------|------|------|------|------|------|------|------|------|------|------|------|------|------|------|------|------|------|------|------|------|------|------|------|------|------|------|------|------|------|------|------|------|------|------|------|------|------|------|------|------|------|------|------|------|------|------|------|------|------|------|------|------|------|------|------|------|------|------|------|------|------|------|------|------|------|------|------|------|------|------|------|------|------|------|------|------|------|------|------|------|------|------|------|------|------|------|------|------|------|------|------|------|------|------|------|------|------|------|------|------|------|------|------|------|------|------|------|------|------|------|------|------|------|------|------|------|------|------|------|------|------|------|------|------|------|------|------|------|------|------|------|------|------|------|------|------|------|------|------|------|------|------|------|------|------|------|------|------|------|------|------|------|------|------|------|------|------|------|------|------|------|------|------|------|------|------|------|------|------|------|------|------|------|------|------|------|------|------|------|------|------|------|------|------|------|------|------|------|------|------|------|------|------|------|------|------|------|------|------|------|------|------|------|------|------|------|------|------|------|------|------|------|------|------|------|------|------|------|------|------|------|------|------|------|------|------|------|------|------|------|------|------|------|------|------|------|------|------|------|------|------|------|------|------|------|------|------|------|------|------|------|------|------|------|------|------|------|------|------|------|------|------|------|------|------|------|------|------|------|------|------|------|------|------|------|------|------|------|------|------|------|------|------|------|------|------|------|------|------|------|------|------|------|------|------|------|------|------|------|------|------|------|------|------|------|------|------|------|------|------|------|------|------|------|------|------|------|------|------|------|------|------|------|------|-------|-------|-------|-------|-------|-------|-------|-------|-------|-------|-------|-------|-------|-------|-------|-------|-------|-------|-------|-------|-------|-------|-------|-------|-------|-------|-------|-------|-------|-------|-----|
|------|------------|----------|--------|---------|---------|---------------|---------------|----|----|----|----|----|----|----|----|-----|-----|-----|-----|-----|-----|-----|-----|-----|-----|-----|-----|-----|-----|-----|-----|-----|-----|-----|-----|-----|-----|-----|-----|-----|-----|-----|-----|-----|-----|-----|-----|-----|-----|-----|-----|-----|-----|-----|-----|-----|-----|-----|-----|-----|-----|-----|-----|-----|-----|-----|-----|-----|-----|-----|-----|-----|-----|-----|-----|-----|-----|-----|-----|-----|-----|-----|-----|-----|-----|-----|-----|-----|-----|-----|-----|-----|-----|-----|-----|-----|-----|-----|-----|-----|-----|-----|-----|-----|-----|------|------|------|------|------|------|------|------|------|------|------|------|------|------|------|------|------|------|------|------|------|------|------|------|------|------|------|------|------|------|------|------|------|------|------|------|------|------|------|------|------|------|------|------|------|------|------|------|------|------|------|------|------|------|------|------|------|------|------|------|------|------|------|------|------|------|------|------|------|------|------|------|------|------|------|------|------|------|------|------|------|------|------|------|------|------|------|------|------|------|------|------|------|------|------|------|------|------|------|------|------|------|------|------|------|------|------|------|------|------|------|------|------|------|------|------|------|------|------|------|------|------|------|------|------|------|------|------|------|------|------|------|------|------|------|------|------|------|------|------|------|------|------|------|------|------|------|------|------|------|------|------|------|------|------|------|------|------|------|------|------|------|------|------|------|------|------|------|------|------|------|------|------|------|------|------|------|------|------|------|------|------|------|------|------|------|------|------|------|------|------|------|------|------|------|------|------|------|------|------|------|------|------|------|------|------|------|------|------|------|------|------|------|------|------|------|------|------|------|------|------|------|------|------|------|------|------|------|------|------|------|------|------|------|------|------|------|------|------|------|------|------|------|------|------|------|------|------|------|------|------|------|------|------|------|------|------|------|------|------|------|------|------|------|------|------|------|------|------|------|------|------|------|------|------|------|------|------|------|------|------|------|------|------|------|------|------|------|------|------|------|------|------|------|------|------|------|------|------|------|------|------|------|------|------|------|------|------|------|------|------|------|------|------|------|------|------|------|------|------|------|------|------|------|------|------|------|------|------|------|------|------|------|------|------|------|------|------|------|------|------|------|------|------|------|------|------|------|------|------|------|------|------|------|------|------|------|------|------|------|------|------|------|------|------|------|------|------|------|------|------|------|------|------|------|------|------|------|------|------|------|------|------|------|------|------|------|------|------|------|------|------|------|------|------|------|------|------|------|------|------|------|------|------|------|------|------|------|------|------|------|------|------|------|------|------|------|------|------|------|------|------|------|------|------|------|------|------|------|------|------|------|------|------|------|------|------|------|------|------|------|------|------|------|------|------|------|------|------|------|------|------|------|------|------|------|------|------|------|------|------|------|------|------|------|------|------|------|------|------|------|------|------|------|------|------|------|------|------|------|------|------|------|------|------|------|------|------|------|------|------|------|------|------|------|------|------|------|------|------|------|------|------|------|------|------|------|------|------|------|------|------|------|------|------|------|------|------|------|------|------|------|------|------|------|------|------|------|------|------|------|------|------|------|------|------|------|------|------|------|------|------|------|------|------|------|------|------|------|------|------|------|------|------|------|------|------|------|------|------|------|------|------|------|------|------|------|------|------|------|------|------|------|------|------|------|------|------|------|------|------|------|------|------|------|------|------|------|------|------|------|------|------|------|------|------|------|------|------|------|------|------|------|------|------|------|------|------|------|------|------|------|------|------|------|------|------|------|------|------|------|------|------|------|------|------|------|------|------|------|------|------|------|------|------|------|------|------|------|------|------|------|------|------|------|------|------|------|------|------|------|------|------|------|------|------|------|------|------|------|------|------|------|------|------|------|------|------|------|------|------|------|------|------|------|------|------|------|------|------|------|------|------|------|------|------|------|------|------|------|------|------|------|------|------|------|------|------|------|------|------|------|------|------|------|------|------|------|------|------|------|------|------|------|------|------|------|------|------|------|------|------|------|------|------|------|------|------|------|------|------|------|------|------|------|------|------|------|------|------|------|------|------|------|------|------|------|------|------|------|------|------|------|------|------|------|------|------|------|------|------|------|------|------|------|------|------|------|------|------|------|------|------|------|------|------|------|------|------|------|------|------|------|------|------|------|------|------|------|------|------|------|------|------|------|------|------|------|------|------|------|------|------|------|------|------|------|------|------|------|------|------|------|------|------|------|------|------|------|------|------|------|------|------|------|------|------|------|------|------|------|------|------|------|------|------|------|------|------|------|------|------|------|------|------|------|------|------|------|------|------|------|------|------|------|------|------|------|------|------|------|------|------|------|------|------|------|------|------|------|------|------|------|------|------|------|------|------|------|------|------|------|------|------|------|------|------|------|------|------|------|------|------|------|------|------|------|------|------|------|-------|-------|-------|-------|-------|-------|-------|-------|-------|-------|-------|-------|-------|-------|-------|-------|-------|-------|-------|-------|-------|-------|-------|-------|-------|-------|-------|-------|-------|-------|-----|

**Table 3: Results of NINJ2 associations with total and ischemic stroke adjusted for age-, sex- and various stroke risk factors**

|                                                                      | <b>Rs11833579</b> | <b>Rs12425791</b> |
|----------------------------------------------------------------------|-------------------|-------------------|
| <b>Total stroke</b>                                                  |                   |                   |
| Adjusted for age-,sex                                                | 1.26 (1.16-1.37)  | 1.30 (1.19-1.42)  |
| Adjusted for age-,sex- and systolic blood pressure                   | 1.24 (1.14-1.34)  | 1.30 (1.20-1.41)  |
| Adjusted for age-,sex- and presence of hypertension (JNC-7 criteria) | 1.25 (1.15-1.36)  | 1.30 (1.19-1.42)  |
| Adjusted for age-,sex- and presence of diabetes                      | 1.25 (1.15-1.36)  | 1.28 (1.18-1.40)  |
| Adjusted for age-,sex- and current smoking status                    | 1.26 (1.16-1.37)  | 1.30 (1.19-1.42)  |
| Adjusted for age-,sex- and presence of atrial fibrillation           | 1.28 (1.18-1.39)  | 1.33 (1.21-1.45)  |
| Adjusted for age-,sex- and all of the above                          | 1.27 (1.17-1.39)  | 1.31 (1.20-1.43)  |
| <b>Ischemic Stroke</b>                                               |                   |                   |
| Adjusted for age-,sex                                                | 1.33 (1.21-1.46)  | 1.33 (1.21-1.47)  |
| Adjusted for age-,sex- and systolic blood pressure                   | 1.30 (1.19-1.43)  | 1.36 (1.24-1.50)  |
| Adjusted for age-,sex- and presence of hypertension (JNC-7 criteria) | 1.33 (1.21-1.46)  | 1.36 (1.24-1.51)  |
| Adjusted for age-,sex- and presence of diabetes                      | 1.32 (1.20-1.45)  | 1.34 (1.21-1.48)  |
| Adjusted for age-,sex- and current smoking status                    | 1.32 (1.20-1.45)  | 1.35 (1.22-1.49)  |
| Adjusted for age-,sex- and presence of atrial fibrillation           | 1.32 (1.20-1.45)  | 1.38 (1.25-1.52)  |
| Adjusted for age-,sex- and all of the above                          | 1.34 (1.21-1.47)  | 1.35 (1.22-1.50)  |

\*All results are presented as HR (hazard ratio) and 95% CI (confidence interval) per copy of minor allele, these results are based on directly genotyped data for rs11833579 and rs12425791.

**Table 4. Characteristics of Participants in Replication Cohorts**

| STUDY                              | ARIC African-American | CHS African-American | The Netherlands (White) |            |
|------------------------------------|-----------------------|----------------------|-------------------------|------------|
|                                    | cohort                | cohort               | Cases                   | Controls   |
| Number in sample*                  | 2430                  | 574                  | 652                     | 3613       |
| Women %                            | 63%                   | 65%                  | 48%                     | 62%        |
| Mean follow-up (yrs)               | 14.7 (3.6)            | 9.9 (4.03)           | -                       | -          |
| <i>at DNA draw</i>                 | 53.6 (5.7)            | 72.5 (5.5)           | 76.5 (7.0)              | 74.6 (7.0) |
| <i>at stroke</i>                   | 63.8 (6.9)            | 79.97 (5.8)          | 76.5 (7.0)              | 74.6 (7.0) |
| Number of total strokes            | 214                   | 85                   | 652                     | -          |
| Number of ischemic strokes         | 191                   | 68                   | 501                     | -          |
| Number of atherothrombotic strokes | 153                   | 57                   | 400                     | -          |

**Table 5: Association of rs12425791 and rs11833579 with various stroke related phenotypes in discovery and replication cohorts**

|                           | Discovery                             |      |                       |                                    |      |                       | Replication                    |      |                      |                             |      |    |                                               |      |                      |
|---------------------------|---------------------------------------|------|-----------------------|------------------------------------|------|-----------------------|--------------------------------|------|----------------------|-----------------------------|------|----|-----------------------------------------------|------|----------------------|
|                           | Using genotyped and imputed GWAS data |      |                       | Using only directly genotyped data |      |                       | ARIC African - American cohort |      |                      | CHS African-American cohort |      |    | Netherlands, white case-control sample cohort |      |                      |
|                           | n                                     | HR   | p                     | n                                  | HR   | p                     | n                              | RR   | p                    | n                           | HR   | p  | n                                             | HR   | p                    |
| <b>Rs12425791</b>         |                                       |      |                       |                                    |      |                       |                                |      |                      |                             |      |    |                                               |      |                      |
| Total stroke              | 1544                                  | 1.31 | 1.5x10 <sup>-8</sup>  | 1544                               | 1.30 | 5.0x10 <sup>-9</sup>  | 215                            | 1.35 | 3.6x10 <sup>-2</sup> | 85                          | 0.58 | ns | 652                                           | 1.17 | 3.5x10 <sup>-2</sup> |
| Ischemic stroke           | 1164                                  | 1.39 | 2.6x10 <sup>-9</sup>  | 1164                               | 1.33 | 1.2x10 <sup>-8</sup>  | 191                            | 1.42 | 1.9x10 <sup>-2</sup> | 68                          | 0.49 | ns | 501                                           | 1.19 | 3.7x10 <sup>-2</sup> |
| Atherothrombotic          | -                                     | -    | -                     | 876                                | 1.37 | 3.3x10 <sup>-8</sup>  | 153                            | 1.41 | 4.1x10 <sup>-2</sup> | 57                          | 0.51 | ns | 400                                           | 1.29 | 5.2x10 <sup>-3</sup> |
| <b>Rs11833579</b>         |                                       |      |                       |                                    |      |                       |                                |      |                      |                             |      |    |                                               |      |                      |
| Total stroke              | 1544                                  | 1.32 | 4.8x10 <sup>-9</sup>  | 1544                               | 1.26 | 6.1x10 <sup>-8</sup>  | 215                            | 1.15 | ns                   | 85                          | 0.72 | ns | 652                                           | 1.10 | ns                   |
| Ischemic stroke           | 1164                                  | 1.41 | 2.3x10 <sup>-10</sup> | 1164                               | 1.33 | 2.3x10 <sup>-9</sup>  | 191                            | 1.20 | ns                   | 68                          | 0.65 | ns | 501                                           | 1.11 | ns                   |
| Atherothrombotic          | -                                     | -    | -                     | 876                                | 1.35 | 4.0x10 <sup>-8</sup>  | 153                            | 1.28 | ns <sup>†</sup>      | 57                          | 0.65 | ns | 400                                           | 1.19 | 4.8x10 <sup>-2</sup> |
| <b>Meta-meta analysis</b> |                                       |      |                       |                                    |      |                       |                                |      |                      |                             |      |    |                                               |      |                      |
|                           | All data in whites                    |      |                       | All data                           |      |                       |                                |      |                      |                             |      |    |                                               |      |                      |
|                           | n                                     | HR   | p                     | n                                  | HR   | p                     |                                |      |                      |                             |      |    |                                               |      |                      |
| <b>Rs12425791</b>         |                                       |      |                       |                                    |      |                       |                                |      |                      |                             |      |    |                                               |      |                      |
| Total stroke              | 2196                                  | 1.27 | 1.0x10 <sup>-9</sup>  | 2496                               | 1.26 | 7.9x10 <sup>-10</sup> |                                |      |                      |                             |      |    |                                               |      |                      |
| Ischemic stroke           | 1665                                  | 1.29 | 2.4x10 <sup>-9</sup>  | 1924                               | 1.29 | 1.1x10 <sup>-9</sup>  |                                |      |                      |                             |      |    |                                               |      |                      |
| Atherothrombotic          | 1029                                  | 1.35 | 7.2x10 <sup>-10</sup> | 1486                               | 1.33 | 5.2x10 <sup>-10</sup> |                                |      |                      |                             |      |    |                                               |      |                      |
| <b>Rs11833579</b>         |                                       |      |                       |                                    |      |                       |                                |      |                      |                             |      |    |                                               |      |                      |
| Total stroke              | 2196                                  | 1.21 | 1.2x10 <sup>-7</sup>  | 2496                               | 1.19 | 4.3x10 <sup>-7</sup>  |                                |      |                      |                             |      |    |                                               |      |                      |
| Ischemic stroke           | 1665                                  | 1.27 | 6.4x10 <sup>-9</sup>  | 1924                               | 1.24 | 2.3x10 <sup>-8</sup>  |                                |      |                      |                             |      |    |                                               |      |                      |
| Atherothrombotic          | 1029                                  | 1.30 | 1.3x10 <sup>-8</sup>  | 1486                               | 1.28 | 2.2x10 <sup>-8</sup>  |                                |      |                      |                             |      |    |                                               |      |                      |

n= number of strokes in sample

<sup>†</sup> Two-sided p-values are shown, one-sided p-value for this replication analysis is 0.04 falling below a threshold of p<0.05.



**Table 6: Associations with Putative Candidate Stroke SNPs in the CHARGE meta-analysis**

| Chr | Gene Name                                | Gene Symbol | Candidate SNP                     | proxy SNP         | coded allele                                                                                                       | Total stroke            |              | Ischemic stroke         |             |  |
|-----|------------------------------------------|-------------|-----------------------------------|-------------------|--------------------------------------------------------------------------------------------------------------------|-------------------------|--------------|-------------------------|-------------|--|
|     |                                          |             |                                   |                   |                                                                                                                    | Hazard ratio            | pvalue       | Hazard ratio            | pvalue      |  |
| 1   | 5,10-methylenetetrahydrofolate reductase | MTHFR       | C677T = rs1801133                 |                   | C                                                                                                                  | 0.94 (0.86-1.02)        | 0.12         | 0.93 (0.84-1.02)        | 0.11        |  |
| 1   | Factor V leiden                          | F5          | 1691G>A = rs6025                  | NA                |                                                                                                                    |                         |              |                         |             |  |
| 4   | intergenic                               |             | Rs2200733                         |                   | C                                                                                                                  | 0.97 (0.86-1.08)        | 0.55         | 1.00 (0.88-1.15)        | 0.95        |  |
| 5   | Phosphodiesterase 4D                     | PDE4D       | SNP 39 = rs3887175                |                   | T                                                                                                                  | 1.01 (0.91-1.13)        | 0.81         | 1.00 (0.88-1.13)        | 0.96        |  |
|     |                                          |             | SNP 41 = rs12188950               |                   | C                                                                                                                  | 0.97 (0.87-1.08)        | 0.57         | 0.97 (0.86-1.10)        | 0.66        |  |
|     |                                          |             | SNP 45 = rs12153798               |                   | C                                                                                                                  | 1.02 (0.91-1.13)        | 0.78         | 1.03 (0.91-1.16)        | 0.67        |  |
|     |                                          |             | SNP 56 = rs702553                 | NA                |                                                                                                                    |                         |              |                         |             |  |
|     |                                          |             | SNP 83 = rs1396476                |                   | G                                                                                                                  | 1.03 (0.93-1.14)        | 0.56         | 0.99 (0.88-1.12)        | 0.87        |  |
|     |                                          |             | SNP 87 = rs966221                 |                   | C                                                                                                                  | 0.98 (0.91-1.06)        | 0.68         | 0.96 (0.88-1.06)        | 0.43        |  |
|     |                                          |             | SNP 89 = rs2910829                |                   | G                                                                                                                  | 1.01 (0.94-1.09)        | 0.80         | 1.01 (0.93-1.11)        | 0.76        |  |
| 7   | Serpin peptidase inhibitor               | SERPINE1    | 11053G/T = rs7242                 |                   | G                                                                                                                  | 0.98 (0.91-1.06)        | 0.63         | 0.99 (0.91-1.08)        | 0.86        |  |
|     |                                          |             | -675 G4/G5 = rs1799768            | NA                |                                                                                                                    |                         |              |                         |             |  |
| 9   | intergenic                               |             | Rs1537378                         |                   | C                                                                                                                  | 1.05 (0.97-1.14)        | 0.21         | 1.06 (0.97-1.16)        | 0.22        |  |
| 11  | Prothrombin                              | F2          | 20210G>A = rs1799963              | NA                | See Supplementary Table A rows 206-211 for other SNPs (not in LD with candidate SNP) in this gene at $p < 10^{-4}$ |                         |              |                         |             |  |
| 11  | Glycoprotein 1 b alpha                   | GP1BA       | HPA-2 (Thr/Met) = rs6065          |                   | C                                                                                                                  | 0.92 (0.80-1.05)        | 0.219        | 0.93 (0.79-1.09)        | 0.35        |  |
|     |                                          |             | Kozak sequence -5 C/T = rs2243093 | <b>rs16954257</b> | <b>T</b>                                                                                                           | <b>0.86 (0.76-0.98)</b> | <b>0.020</b> | <b>0.83 (0.72-0.97)</b> | <b>0.02</b> |  |
| 13  | Arachidonate 5-lipoxygenase-activating   | ALOX5AP     | SG13S25 = rs17222814              | NA                |                                                                                                                    |                         |              |                         |             |  |

|    | protein                       |      |                  |        |   |                  |      |                  |      |  |
|----|-------------------------------|------|------------------|--------|---|------------------|------|------------------|------|--|
| 17 | Angiotensin converting enzyme | ACE  | I/D = rs1799752  | rs4343 | G | 1.04 (0.96-1.12) | 0.32 | 1.03 (0.94-1.12) | 0.54 |  |
| 19 | Apolipoprotein E              | APOE | rs7412, rs429358 | NA     |   |                  |      |                  |      |  |

If the reported SNP was not present in our dataset, a proxy SNP was selected using the SNAP program

<http://www.broad.mit.edu/mpg/snap/>

A proxy SNP was required to have an  $r^2 > 0.8$  with the reported SNP. If no such proxy SNP was present in our dataset this is indicated as NA (not available).
